# Supplementary material for: Insight into biomass feedstock on formation of biochar-bound environmentally persistent free radicals under different pyrolysis temperatures
Source: Royal Society of Chemistry journal article supplement (doi:10.1039/d2ra03052g), 2022-01-01
Supplement: d2ra03052g1.pdf [file d2ra03052g1.pdf]

## Supplementary materials

### **Insight into biomass feedstock on formation of biochar-bound environment persistent free radicals under different pyrolysis temperatures**

Yu Wang<sup>1</sup>, Xinfeng Gu<sup>1</sup>, Yue Huang<sup>1</sup>, Zhuhong Ding<sup>1\*</sup>, Yijun Chen<sup>2</sup>, Xin Hu<sup>2</sup>

<sup>1</sup> School of Environmental Science & Engineering, Nanjing Tech University, 30 Puzhu Southern Road, Nanjing 211816, P.R. China

<sup>2</sup> State Key Laboratory of Analytical Chemistry for Life Science, Centre of Materials Analysis and School of Chemistry & Chemical Engineering, Nanjing University, 22 Hankou Road, Nanjing 210023, PR China

\* Corresponding authors: Email: dzuhong@njtech.edu.cn (Zhuhong Ding)

Table S1. Relevant literature data of types of biomass, pyrolysis temperature, residence time, g-factor, line width, and spin concentrations of EPFRs

| Biomass                                            | Temp/resid *<br>(°C/h) | g-factor        | Line width<br>(ΔHp-p) | EPFR Conc.<br>(10 <sup>18</sup> spins/g) | EPFR type(s)    | References |
|----------------------------------------------------|------------------------|-----------------|-----------------------|------------------------------------------|-----------------|------------|
| <b>Lignocellulosic biomass (woody biomass)</b>     |                        |                 |                       |                                          |                 |            |
| Poplar sawdust                                     | 300/1~5                | 2.0031 ± 0.0002 |                       | 1.75                                     |                 | 1          |
|                                                    | 400/1~5                | 2.0027 ± 0.0001 |                       | 4.17                                     | Carbon-centered |            |
|                                                    | 500/1~5                | 2.0026 ± 0.0002 |                       | 6.23                                     | Carbon-centered |            |
|                                                    | 600/1~5                | 2.0024 ± 0.0001 |                       | 2.48                                     | Carbon-centered |            |
| Pine sawdust                                       | 300/1~5                | 2.0033 ± 0.0003 |                       | 2.36                                     | Carbon/Oxygen** | 1          |
|                                                    | 400/1~5                | 2.0029 ± 0.0001 |                       | 2.23                                     | Carbon-centered |            |
|                                                    | 500/1~5                | 2.0028 ± 0.0001 |                       | 6.44                                     | Carbon-centered |            |
|                                                    | 600/1~5                | 2.0027 ± 0.0002 |                       | 2.09                                     | Carbon-centered |            |
| Pine needles                                       | 300/6                  | 2.0044 ± 0.0002 | 7.2 ± 0.1             | 5.38 ± 0.02                              | Oxygen-centered | 2          |
|                                                    | 400/6                  | 2.0037 ± 0.0001 | 6.8 ± 0.2             | 15.2 ± 0.03                              | Carbon/Oxygen   |            |
|                                                    | 500/6                  | 2.0032 ± 0.0001 | 6.5 ± 0.2             | 22.3 ± 0.04                              | Carbon/Oxygen   |            |
|                                                    | 350/na***              | 2.0034 ± 0.0001 | 6.6 ± 0.1             | 1.96 ± 0.01                              | Carbon/Oxygen   |            |
| Coconut shell                                      | 550/na                 | 2.0028 ± 0.0002 | 4.5 ± 0.2             | 13.7 ± 0.06                              | Carbon/Oxygen   | 3          |
|                                                    | 300/na                 | 2.0041          |                       | 3.57                                     | Oxygen-centered |            |
|                                                    | 400/na                 | 2.0032          |                       | 11.3                                     | Carbon/Oxygen   |            |
|                                                    | 500/na                 | 2.0026          |                       | 14.6                                     | Carbon-centered |            |
| Walnut shell                                       | 600/na                 | 2.0024          |                       | 2.74                                     | Carbon-centered | 4          |
|                                                    | 300/na                 | 2.0043          |                       | 1.25                                     | Oxygen-centered |            |
|                                                    | 400/na                 | 2.0039          |                       | 7.29                                     | Carbon/Oxygen   |            |
|                                                    | 500/na                 | 2.0027          |                       | 28.8                                     | Carbon-centered |            |
| Eucalyptus leaves                                  | 600/na                 | 2.0026          |                       | 8.44                                     | Carbon-centered | 4          |
|                                                    | 300/na                 | 2.0043          |                       | 4.52                                     | Oxygen-centered |            |
|                                                    | 400/na                 | 2.0039          |                       | 3.96                                     | Carbon/Oxygen   |            |
|                                                    | 500/na                 | 2.0027          |                       | 35.3                                     | Carbon-centered |            |
|                                                    | 600/na                 | 2.0026          |                       | 8.77                                     | Carbon-centered |            |
| <b>Lignocellulosic biomass (non-woody biomass)</b> |                        |                 |                       |                                          |                 |            |
| Wheat straw                                        | 300/na                 | 2.0036 ± 0.0001 | 6.5 ± 0.1             | 7.72 ± 0.05                              | Carbon/Oxygen   | 3          |
|                                                    | 400/na                 | 2.0030 ± 0.0002 | 5.0 ± 0.2             | 16.5 ± 0.09                              | Carbon/Oxygen   |            |

|                                    |           |                 |             |                           |                 |    |
|------------------------------------|-----------|-----------------|-------------|---------------------------|-----------------|----|
|                                    | 500/na    | 2.0029 ± 0.0001 | 4.8 ± 0.1   | 28.6 ± 0.12               | Carbon-centered |    |
|                                    | 300/6     | 2.0042 ± 0.0002 | 6.8 ± 0.1   | 3.68 ± 0.01               | Oxygen-centered | 2  |
|                                    | 400/6     | 2.0036 ± 0.0001 | 6.5 ± 0.2   | 7.35 ± 0.06               | Carbon/Oxygen   |    |
|                                    | 500/6     | 2.0031 ± 0.0002 | 6.4 ± 0.1   | 13.3 ± 0.07               | Carbon/Oxygen   |    |
| Corn straw                         | 300/2     | 2.0040          | 4.786       | 3.966                     | Oxygen-centered | 5  |
| Corn stalks                        | 500/2h    | 2.0049          | 6.9         | 9.67                      | Oxygen-centered | 6  |
| Maize straw                        | 300/na    | 2.0037 ± 0.0001 | 6.8 ± 0.3   | 3.88 ± 0.08               | Carbon/Oxygen   | 3  |
|                                    | 400/na    | 2.0031 ± 0.0002 | 6.2 ± 0.2   | 6.25 ± 0.12               | Carbon/Oxygen   |    |
|                                    | 500/na    | 2.0029 ± 0.0002 | 5.2 ± 0.1   | 30.2 ± 0.09               | Carbon/Oxygen   |    |
|                                    | 300/6     | 2.0040 ± 0.0003 | 7.1 ± 0.3   | 1.25 ± 0.04               | Oxygen-centered | 2  |
|                                    | 400/6     | 2.0038 ± 0.0002 | 6.9 ± 0.2   | 2.48 ± 0.11               | Carbon/Oxygen   |    |
|                                    | 500/6     | 2.0035 ± 0.0001 | 6.4 ± 0.1   | 11.1 ± 0.05               | Carbon/Oxygen   |    |
| Rice husk                          | 300/na    | 2.0041 ± 0.0001 | 2.77 ± 0.05 | 6.9 ± 0.1                 | Oxygen-centered | 7  |
|                                    | 700/na    | 2.0036 ± 0.0001 | 0.16 ± 0.09 | 1.8 ± 0.1                 | Carbon/Oxygen   |    |
|                                    | 300/4     | 2.0039          | 6.9         | 2.77                      | Carbon/Oxygen   | 8  |
|                                    | 400/4     | 2.0038          | 5.7         | 6.40                      | Carbon/Oxygen   |    |
|                                    | 500/4     | 2.0034          | 5.1         | 17.1                      | Carbon/Oxygen   |    |
|                                    | 600/4     | 2.0032          | 2.2         | 1.76                      | Carbon/Oxygen   |    |
|                                    | 700/4     | 2.0032          | 1.8         | 0.16                      | Carbon/Oxygen   |    |
| Bamboo                             | 500/2h    | 2.0046          | 6.2         | 7.94                      | Oxygen-centered | 6  |
| Moso bamboo                        | 300/2     | 2.0039          |             | 4.46                      | Carbon/Oxygen   | 9  |
|                                    | 400/2     | 2.0032          |             | 6.89                      | Carbon/Oxygen   |    |
|                                    | 500/2     | 2.0026          |             | 24.5                      | Carbon-centered |    |
|                                    | 600/2     | 2.0022          |             | 2.75                      | Carbon-centered |    |
| Cellulose/urea (1/1)               | 400/30min | 2.0040          | 5.3         | 1.634 ± 0.038             | Oxygen-centered | 10 |
|                                    | 450/30min | 2.0038          | 4.6         | 1.928 ± 0.042             | Carbon/Oxygen   |    |
|                                    | 500/30min | 2.0037          | 3.5         | 2.132 ± 0.039             | Carbon/Oxygen   |    |
|                                    | 550/30min | 2.0036          | 2.7         | 2.011 ± 0.043             | Carbon/Oxygen   |    |
|                                    | 600/30min | 2.0036          | 3.2         | 1.731 ± 0.024             | Carbon/Oxygen   |    |
| <b>Non-lignocellulosic biomass</b> |           |                 |             |                           |                 |    |
| Sludge                             | 200/2     | 2.0029          | 9.0         | 4.42 (×10 <sup>16</sup> ) | Carbon-centered | 11 |
|                                    | 300/2     | 2.0035          | 8.0         | 4.26 (×10 <sup>16</sup> ) | Carbon/Oxygen   |    |
|                                    | 400/2     | 2.0001          | 11.0        | 3.90 (×10 <sup>16</sup> ) | Carbon-centered |    |

|                           |         |                     |                 |                           |                 |    |
|---------------------------|---------|---------------------|-----------------|---------------------------|-----------------|----|
|                           | 500/2   | 2.0049              | 11.0            | 2.72 ( $\times 10^{16}$ ) | Oxygen-centered |    |
|                           | 600/2   | 2.0048              | 10.0            | 2.16 ( $\times 10^{16}$ ) | Oxygen-centered |    |
| <i>Laminaria japonica</i> | 200/2~4 | 2.0044              | 6.913           | 1.62                      | Oxygen-centered | 12 |
|                           | 300/2~4 | 2.0039              | 8.405           | 40.2                      | Carbon/Oxygen   |    |
|                           | 400/2~4 | 2.0035              | 8.015           | 42.4                      | Carbon/Oxygen   |    |
|                           | 500/2~4 | 2.0029              | 3.568           | 46.1                      | Carbon-centered |    |
|                           | 600/2~4 | 2.0028              | 2.590           | 2.04                      | Carbon-centered |    |
|                           | 700/2~4 | 2.0029              | 6.110           | 0.220                     | Carbon-centered |    |
| Pig manure                | 500/2h  | 2.0048              | 7.0             | 14.13                     | Oxygen-centered | 6  |
| Swine manure              | 300/2h  | 2.0044 $\pm$ 0.0002 | 6.8 $\pm$ 0.3   | 7.45 $\pm$ 0.03           | Oxygen-centered | 13 |
|                           | 600/2h  | 2.0041 $\pm$ 0.0001 | 7.0 $\pm$ 0.2   | 13.96 $\pm$ 0.04          | Oxygen-centered |    |
|                           | 900/2h  | 2.0034 $\pm$ 0.0001 | 6.6 $\pm$ 0.3   | 11.23 $\pm$ 0.06          | Carbon/Oxygen   |    |
| Cow manure                | 300/na  | 2.0046 $\pm$ 0.0001 | 2.20 $\pm$ 0.01 | 7.1 $\pm$ 0.1             | Oxygen-centered | 7  |
|                           | 700/na  | 2.0036 $\pm$ 0.0002 | 0.95 $\pm$ 0.06 | 3.4 $\pm$ 0.1             | Carbon/Oxygen   |    |

\* Temp: Pyrolysis temperature/residence time ( $^{\circ}\text{C}/\text{h}$ ); \*\* Carbon/Oxygen: carbon-centered radicals with an adjacent oxygen atom ( $2.0030 < g < 2.0040$ ) [Oxygen-centered ( $g > 2.0040$ ); Carbon: Carbon-centered ( $g < 2.0030$ )]; \*\*\* na: not available (not mentioned).

Table S2. Main elements and atomic ratios of the resulting biochars

|        | N     | C    | H     | Ash   | O    | H/C   | O/C    | Al    | Ca    | K     | Mg    | Na    | Cu    | Fe    | Mn    | Zn    |
|--------|-------|------|-------|-------|------|-------|--------|-------|-------|-------|-------|-------|-------|-------|-------|-------|
|        | %     | %    | %     | %     | %    |       |        | %     | %     | %     | %     | %     | mg/kg | mg/kg | mg/kg | mg/kg |
| WC200  | 0.491 | 49.5 | 6.05  | 2.80  | 41.2 | 1.47  | 0.625  | 0.030 | 0.108 | 0.100 | 0.019 | 0.021 | 2.14  | 24.8  | 6.54  | 5.15  |
| WC300  | 0.426 | 70.5 | 4.85  | 3.28  | 21.0 | 0.826 | 0.223  | 0.037 | 0.518 | 0.364 | 0.098 | 0.082 | 5.76  | 49.4  | 14.6  | 21.1  |
| WC400  | 0.360 | 75.7 | 3.86  | 3.61  | 16.5 | 0.612 | 0.163  | 0.048 | 0.748 | 0.602 | 0.142 | 0.122 | 10.4  | 118   | 21.6  | 30.1  |
| WC500  | 0.289 | 80.4 | 3.51  | 4.21  | 11.6 | 0.524 | 0.108  | 0.062 | 0.862 | 0.684 | 0.167 | 0.131 | 10.9  | 144   | 27.2  | 32.4  |
| WC600  | 0.251 | 83.0 | 3.02  | 4.83  | 8.93 | 0.437 | 0.0807 | 0.071 | 0.894 | 0.753 | 0.183 | 0.132 | 11.2  | 346   | 37.5  | 33.2  |
| WC700  | 0.120 | 84.7 | 2.41  | 5.09  | 7.68 | 0.341 | 0.0680 | 0.194 | 0.924 | 0.79  | 0.195 | 0.140 | 13.0  | 544   | 38.7  | 34.8  |
| RH200  | 3.21  | 20.3 | 2.84  | 60.7  | 13.0 | 1.68  | 0.478  | 0.026 | 0.123 | 0.299 | 0.043 | 0.016 | 3.56  | 105   | 271   | 14.5  |
| RH300  | 2.25  | 21.4 | 2.22  | 66.2  | 7.93 | 1.24  | 0.277  | 0.069 | 0.183 | 0.462 | 0.075 | 0.020 | 3.83  | 358   | 433   | 25.4  |
| RH400  | 1.67  | 24.5 | 1.53  | 67.4  | 4.93 | 0.749 | 0.151  | 0.092 | 0.250 | 0.547 | 0.089 | 0.028 | 6.66  | 415   | 442   | 27.6  |
| RH500  | 1.45  | 26.2 | 1.16  | 68.2  | 2.94 | 0.531 | 0.0841 | 0.109 | 0.289 | 0.583 | 0.091 | 0.035 | 5.60  | 480   | 456   | 32.4  |
| RH600  | 1.12  | 27.4 | 0.94  | 68.8  | 1.82 | 0.412 | 0.0499 | 0.127 | 0.313 | 0.639 | 0.101 | 0.041 | 18.6  | 536   | 469   | 35.2  |
| RH700  | 0.920 | 27.6 | 0.660 | 69.6  | 1.19 | 0.287 | 0.0323 | 0.169 | 0.329 | 0.663 | 0.110 | 0.054 | 17.7  | 720   | 490   | 43.5  |
| PN200  | 0.950 | 39.7 | 4.95  | 22.8  | 31.5 | 1.50  | 0.596  | 0.064 | 0.754 | 0.413 | 0.344 | 0.025 | 4.71  | 93.2  | 846   | 44.8  |
| PN300  | 0.780 | 43.8 | 4.16  | 30.2  | 21.1 | 1.14  | 0.362  | 0.094 | 0.936 | 0.957 | 0.621 | 0.044 | 12.7  | 173   | 1494  | 106   |
| PN400  | 0.710 | 50.3 | 3.26  | 34.4  | 11.4 | 0.778 | 0.169  | 0.108 | 1.169 | 1.355 | 0.911 | 0.052 | 15.3  | 280   | 1833  | 171   |
| PN500  | 0.510 | 52.8 | 2.50  | 35.52 | 8.71 | 0.569 | 0.124  | 0.117 | 1.429 | 1.673 | 1.051 | 0.062 | 22.6  | 333   | 2345  | 199   |
| PN600  | 0.560 | 55.7 | 2.36  | 36.4  | 4.92 | 0.508 | 0.0662 | 0.120 | 1.456 | 1.775 | 1.153 | 0.075 | 24.0  | 381   | 2524  | 230   |
| PN700  | 0.430 | 56.9 | 1.71  | 38.1  | 2.79 | 0.360 | 0.0367 | 0.128 | 1.505 | 1.948 | 1.161 | 0.093 | 32.0  | 417   | 2795  | 242   |
| ADS200 | 3.83  | 57.9 | 6.16  | 3.62  | 28.5 | 1.28  | 0.368  | 6.975 | 6.46  | 0.559 | 0.346 | 0.750 | 878   | 29315 | 2658  | 2133  |
| ADS300 | 3.33  | 66.1 | 5.26  | 5.46  | 19.8 | 0.954 | 0.225  | 7.962 | 7.489 | 0.595 | 0.389 | 0.844 | 1039  | 33485 | 3280  | 2542  |
| ADS400 | 2.81  | 70.6 | 3.59  | 7.44  | 15.6 | 0.610 | 0.166  | 8.493 | 8.264 | 0.643 | 0.419 | 0.921 | 1126  | 37745 | 3941  | 2697  |
| ADS500 | 2.43  | 76.5 | 3.15  | 8.19  | 9.71 | 0.494 | 0.0952 | 8.858 | 8.527 | 0.695 | 0.444 | 0.977 | 1183  | 38002 | 4032  | 2958  |
| ADS600 | 1.08  | 77.8 | 2.57  | 9.94  | 8.62 | 0.396 | 0.0831 | 9.262 | 8.786 | 0.706 | 0.463 | 0.988 | 1202  | 38609 | 4157  | 3096  |
| ADS700 | 0.950 | 79.9 | 2.33  | 12.9  | 3.97 | 0.350 | 0.0373 | 9.671 | 9.208 | 0.722 | 0.495 | 1.029 | 1262  | 38922 | 4394  | 3170  |
| DW500  | 2.48  | 49.7 | 2.78  | 35.5  | 9.61 | 0.672 | 0.145  | 0.146 | 1.270 | 0.499 | 0.636 | 0.080 | 23.4  | 703   | 221   | 167   |
| BK500  | 1.02  | 58.9 | 3.15  | 29.9  | 7.06 | 0.642 | 0.0900 | 0.025 | 0.904 | 0.122 | 0.134 | 0.020 | 19.8  | 361   | 217   | 91.1  |
| CS500  | 0.730 | 71.1 | 3.37  | 14.0  | 10.9 | 0.569 | 0.115  | 0.114 | 0.545 | 0.447 | 0.560 | 0.078 | 21.8  | 341   | 152   | 104   |

Table S3. EPFRs in RH400 under different the pyrolysis time.

|    | Spin     | $\Delta\text{Hp-p}$ | g-factor |
|----|----------|---------------------|----------|
| 1h | 5.53E+19 | 6.16                | 2.0029   |
| 2h | 5.54E+19 | 6.06                | 2.0026   |
| 4h | 6.19E+19 | 5.08                | 2.0028   |
| 8h | 5.60E+19 | 8.49                | 2.0027   |

Table S4. Stability of EPFRs in RHx under room temperature.

|       | 0 d      |          |                     | 7th day  |          |                     | 18th day |          |                     |
|-------|----------|----------|---------------------|----------|----------|---------------------|----------|----------|---------------------|
|       | spins/g  | g-factor | $\Delta\text{Hp-p}$ | spins/g  | g-factor | $\Delta\text{Hp-p}$ | spins/g  | g-factor | $\Delta\text{Hp-p}$ |
| 200°C | 3.28E+17 | 2.0035   | 6.45                | 2.52E+17 | 2.0036   | 5.87                | 1.98E+17 | 2.0039   | 5.87                |
| 300°C | 1.58E+19 | 2.0033   | 7.04                | 1.39E+19 | 2.0035   | 6.65                | 1.05E+19 | 2.0030   | 7.12                |
| 400°C | 5.54E+19 | 2.0028   | 5.47                | 4.83E+19 | 2.0027   | 4.89                | 4.05E+19 | 2.0026   | 4.91                |
| 500°C | 7.11E+19 | 2.0030   | 4.30                | 6.19E+19 | 2.0031   | 4.68                | 5.60E+19 | 2.0028   | 4.11                |
| 600°C | 2.91E+19 | 2.0025   | 3.71                | 2.47E+19 | 2.0027   | 4.27                | 1.95E+19 | 2.0026   | 4.47                |
| 700°C | 7.38E+15 | 2.0025   | 2.15                | 6.61E+15 | 2.0019   | 1.96                | 5.04E+15 | 2.0024   | 2.24                |

## References

- 1 Y. Z. Zhang, M. Q. Xu, S. X. Liang, *et al.*, Mechanism of persulfate activation by biochar for the catalytic degradation of antibiotics: Synergistic effects of environmentally persistent free radicals and the defective structure of biochar, *Science of the Total Environment*, 2021, **794**, 148707.
- 2 G. D. Fang, C. Y. Zhu, D. D. Dionysiou, *et al.*, Mechanism of hydroxyl radical generation from biochar suspensions: Implications to diethyl phthalate degradation, *Bioresource Technology*, 2015, **176**, 210-217.
- 3 G. D. Fang, J. Gao, C. Liu, *et al.*, Key role of persistent free radicals in hydrogen peroxide activation by biochar: Implications to organic contaminant degradation, *Environmental Science & Technology*, 2014, **48**, 1902-1910.
- 4 Y. Z. Zhang, M. Q. Xu, X. K. Liu, *et al.*, Regulation of biochar mediated catalytic degradation of quinolone antibiotics: Important role of environmentally persistent free radicals, *Bioresource Technology*, 2021, **326**, 124780.
- 5 N. Zhao, Z. Yin, F. Liu, *et al.*, Environmentally persistent free radicals mediated removal of Cr(VI) from highly saline water by corn straw biochars, *Bioresource Technology*, 2018, **260**, 294-301.
- 6 D. Huang, H. Luo, C. Zhang, *et al.*, Nonnegligible role of biomass types and its compositions on the formation of persistent free radicals in biochar: Insight into the influences on Fenton-like process, *Chem. Eng. J.*, 2019, **361**, 353-363.
- 7 J. L. Qin, Y. X. Cheng, M. X. Sun, *et al.*, Catalytic degradation of the soil fumigant 1,3-dichloropropene in aqueous biochar slurry, *Science of the Total Environment*, 2016, **569**, 1-8.
- 8 J. L. Qin, Q. C. Chen, M. X. Sun, *et al.*, Pyrolysis temperature-induced changes in the catalytic characteristics of rice husk-derived biochar during 1,3-dichloropropene degradation, *Chem. Eng. J.*, 2017, **330**, 804-812.
- 9 Y. Zhang, M. Xu, R. He, *et al.*, Effect of pyrolysis temperature on the activated permonosulfate degradation of antibiotics in nitrogen and sulfur-doping biochar: Key role of environmentally persistent free radicals, *Chemosphere*, 2022, **294**, 133737.
- 10 D. Bi, F. Huang, M. Jiang, *et al.*, Effect of pyrolysis conditions on environmentally persistent free radicals (EPFRs) in biochar from co-pyrolysis of urea and cellulose, *Science of the Total Environment*, 2022, **805**, 150339.
- 11 Y. Hu, K. Tong, Q. Guo, *et al.*, Effect of controlled temperature and biomass addition on the formed environmental persistent free radicals (EPFRs) in sewage sludge-based biochar from pyrolysis treatment, *Journal of Analytical and Applied Pyrolysis*, 2022, **162**, 105460.
- 12 Y. Huang, X. Guo, Z. Ding, *et al.*, Environmentally persistent free radicals in biochar derived from *Laminaria japonica* grown in different habitats, *Journal of Analytical and Applied Pyrolysis*, 2020, **151**, 104941.
- 13 R. Deng, H. Luo, D. Huang, *et al.*, Biochar-mediated Fenton-like reaction for the degradation of sulfamethazine: Role of environmentally persistent free radicals, *Chemosphere*, 2020, **255**, 126975.
